# Supplementary material for: Nutritional Preconditioning of Apigenin Alleviates Myocardial Ischemia/Reperfusion Injury via the Mitochondrial Pathway Mediated by Notch1/Hes1
Source: PubMed Central journal article supplement (PMC6446095; doi:10.1155/2019/7973098), 2019-03-20
Supplement: 7973098.f1.pdf [file 7973098.f1.pdf]

**Nutritional preconditioning of Apigenin alleviates myocardial  
ischemia/reperfusion injury via mitochondrial pathway mediated by  
Notch1 /Hes1**

**Supplementary Materials**

**Figure S1. Effects of Api pre-treatment with or without co-administration of GSI or Atr on primary cardiomyocyte viability and LDH activity after SI/R.**

Cell viability was similar in the 20 $\mu$ M Api, 10 $\mu$ M GSI, 20 $\mu$ M Api+10 $\mu$ M GSI and 20 $\mu$ M Api+50 $\mu$ M Atr groups compared to control group, and between the 10 $\mu$ M GSI+SI/R and SI/R groups. Values are mean  $\pm$  S.E.M. of 6 individual experiments. (a)  $p < 0.01$  vs. control group; (b)  $p < 0.01$  vs. 50 $\mu$ M Atr group; (c)  $p < 0.01$  vs. SI/R group.

**Figure S2. Effects of Api pre-treatment with or without co-administration of GSI or Atr on LDH activity in the primary cardiomyocytes after SI/R.**

LDH activity was similar in the 20 $\mu$ M Api, 10 $\mu$ M GSI, 20 $\mu$ M Api+10 $\mu$ M GSI and 20 $\mu$ M Api+50 $\mu$ M Atr groups compared to the control group, and between the 10 $\mu$ M GSI+SI/R and SI/R groups. Values are mean  $\pm$  S.E.M. of 6 individual experiments. (a)  $p < 0.01$  vs. control group; (b)  $p < 0.01$  vs. 50  $\mu$ M Atr group; (c)  $p < 0.01$  vs. SI/R group. (Supplementary Materials).

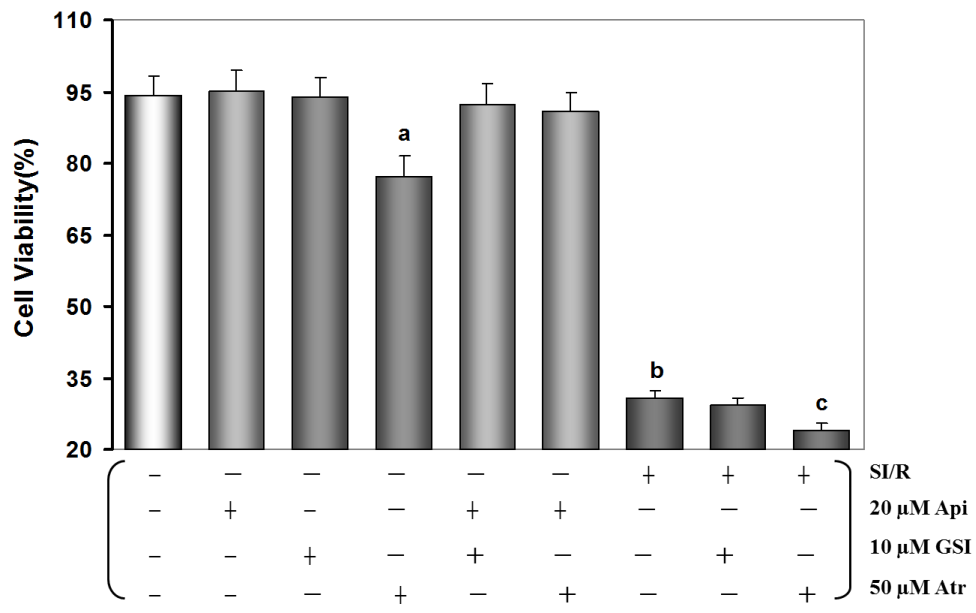

Figure S1

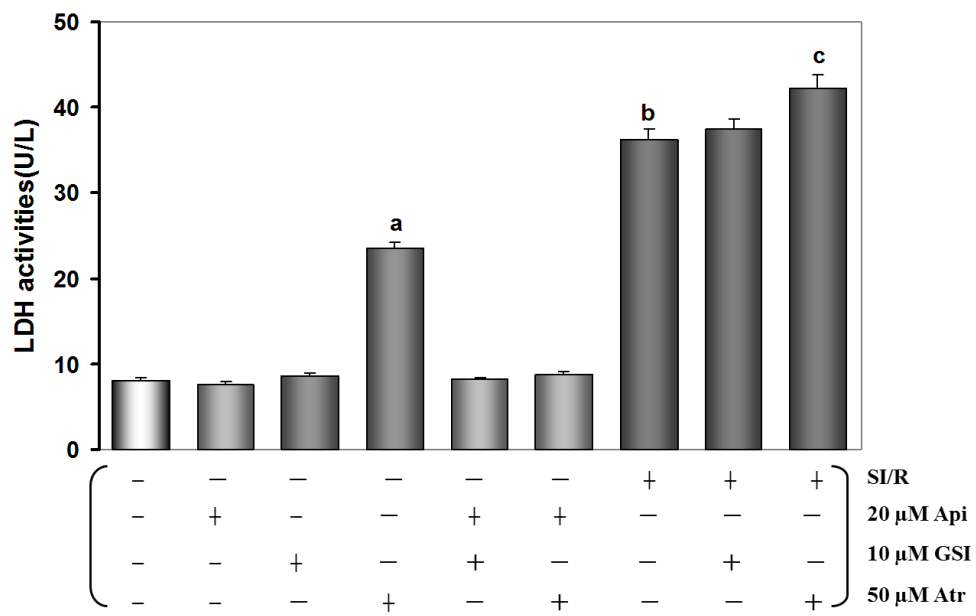

Figure S2
